# Supplementary material for: In situ formed hybrid hydrogels from PEG based multifunctional hyperbranched copolymers: a RAFT approach
Source: Royal Society of Chemistry journal article supplement (doi:10.1039/c3py01513k), 2013-12-17
Supplement: c3py01513k.pdf [file c3py01513k.pdf]

Supplementary Material (ESI) for Polymer Chemistry  
This journal is (c) The Royal Society of Chemistry 2013

## Supplementary information:

### Experimental section

#### Materials

The monomers poly (ethylene glycol) methyl ether methacrylate (PEGMEMA,  $M_n = 500 \text{ g mol}^{-1}$ ) and poly (ethylene glycol) diacrylate (PEGDA,  $M_n = 575 \text{ g mol}^{-1}$ ) were purchased from Sigma-Aldrich. 1'1 – azobis (cyclohexane-carbonitrile) (Sigma-Aldrich, 98%) was used as an initiator. The RAFT agent, 2-cyanoprop-2-yl dithiobenzoate, was synthesised according to published method<sup>35</sup>. Butanone (HPLC grade, Aldrich), hexane (HPLC grade, Aldrich), tetrahydrofuran (THF, Aldrich) chloroform-d ( $\text{CDCl}_3$  Aldrich), diethyl ether (HPLC grade, Aldrich). All reagents and solvents were used without further purification. Thiol-modified hyaluronic acid (HA-SH) was purchased from Glycosan-Hystem<sup>TM</sup> Biotime. alamarBlue<sup>®</sup>, LIVE/DEAD<sup>®</sup> viability/Cytotoxicity kit (Invitrogen), human adipose derived stem cells hADSCs (Invitrogen), MesenPRO RS<sup>TM</sup> medium and Quant-iT<sup>TM</sup> Picogreen<sup>®</sup> dsDNA Assay (Invitrogen) were used as required throughout the study.

#### Methods

##### Synthesis of PEGMEMA - PEGDA Copolymers Using RAFT polymerisation

PEGMEMA-PEGDA copolymers were synthesized by the copolymerization of PEGMEMA ( $M_n = 500 \text{ g mol}^{-1}$ ) and multivinyl branching monomer PEGDA ( $M_n = 575 \text{ g mol}^{-1}$ ) using Reverse Addition-Fragmentation chain Transfer (RAFT) polymerisation. Briefly, the copolymers were prepared in butanone at the concentration of monomer to solvent volume ratio being 1:3 in a 250 ml round bottomed flask. The initiator (1'1 – azobis (cyclohexane-carbonitrile) was added (100:0.8, monomer: initiator mol ratio) and followed by the RAFT agent at a mol ratio of 1.6:100 with respect to the monomers employed. The solution was bubbled with argon for 20-25 minutes to remove any oxygen. The reaction was conducted at 70 °C in an oil bath while being stirred at 700 rpm until the desired polymer molecular weight, conversion and polydispersity was acquired (monitored by Gel Permeation Chromatography - GPC). To terminate the polymerisation, the stopper was removed and exposing the reaction to oxygen and cooling the flask rapidly in water.

The resultant product was precipitated drop wise in hexane/diethyl ether (1.3:1 v/v) mixture. The precipitated product was dissolved in deionised water and purified by dialysis (spectrum dialysis membrane, molecular weight cut off 6000-8000) for 1 day to remove excess monomer. Purified

Supplementary Material (ESI) for Polymer Chemistry  
This journal is (c) The Royal Society of Chemistry 2013

polymer samples were collected by the removal of water through freeze drying yielding a polymer which was sticky in nature.

### **Characterization of PEGMEMA - PEGDA copolymers**

Characterization of the copolymers was carried out by <sup>1</sup>H-NMR and Gel Permeation Chromatography (GPC). Weight average molecular weight ( $M_w$ ), number average molecular weight ( $M_n$ ) and polydispersity (PDI,  $M_w/M_n$ ) were obtained by GPC (Aligent, PL-GPC50) with RI detector. The GPC eluted THF from columns (2 x Agilent PLgel, 5 $\mu$ m, Mixed C 300mm x 7.5 mm) and calibration was carried out using poly (methyl methacrylate) standards. Analysis and Calibration was carried out at 40 °C at a flow rate of 1mL/min. <sup>1</sup>H NMR was carried out on a 300 MHz Bruker NMR with Delta NMR processing software. The chemical shifts were referenced to the lock chloroform (CDCl<sub>3</sub>).

### **Preparation of hydrogels**

The PEGMEMA–PEGDA copolymers (Entry 1, Table 2) were dissolved in 1 M phosphate buffered (PBS) at pH 7.5 to form solutions at 2%, 5% and 10% weight concentrations. These were crosslinked to form 50  $\mu$ L hydrogel networks using thiol modified HA (SH-HA) with the exact weight of each gel being measured ( $W_0$ ). PBS was added to the gel samples at 1:20 (hydrogel : PBS) and allowed to swell at 37 °C. To measure the swelling ratio, PBS was removed and the gels were dried on a blotting paper and weighed at regular time intervals. The swelling ratios were calculated as follows:

$$\text{Swelling ratio} = W_t / W_0$$

Where,  $W_t$  represents the weight of hydrogel at a certain time point and  $W_0$  represents the original weight of the hydrogels. After measuring the weight, the hydrogel samples were rehydrated and were further incubated at 37 °C. The swelling results were the average of 6 samples for each case (n=6).

### **Cell viability and Proliferation assay**

To determine the cytotoxicity of the copolymer, human adipose derived stem cells (hADSCs, (Invitrogen)) were used for 3D encapsulation. hADSCs were encapsulated in (Polymer-HA) hydrogel at a density of  $1 \times 10^6$  cells per mL. hADSCs were mixed with polymer solution (4% Entry 1, table 2) just before crosslinking. Thiolated hyaluronic acid (HA-SH) at 1% was then added at equal volume. The mixture was placed at room temperature for 10 minutes to completely form a gel, followed by transferring the gels into culture medium. Hydrogels (n=6) were incubated at 37°C and 5% CO<sub>2</sub> for 2, 5, and 7 days. hADSCs were maintained in MesenPRO RS™ Medium (includes Basal Medium and Growth Supplement) throughout the experiment with

Supplementary Material (ESI) for Polymer Chemistry  
This journal is (c) The Royal Society of Chemistry 2013

media change every 2-3 days. alamarBlue<sup>®</sup> assay was used to analyse the effect of polymer on cell metabolic activity along with LIVE/DEAD<sup>®</sup> Viability/Cytotoxicity kit (Invitrogen).

After each timepoint, 500 uL alamarBlue<sup>®</sup> (10% in MesenPRO RS<sup>™</sup> media) was added to assess cell metabolic activity. After 6 hours at 37°C and 5% CO<sub>2</sub> 150 uL of alamarBlue<sup>®</sup> was removed and the absorbance at the lower wavelength filter (550 nm) was measured followed by the higher wavelength filter (595 nm) via a thermo scientific Varioskan Flash Plate Reader.

For cellular proliferation in 3D culture, the samples used in alamarBlue<sup>®</sup> assay were washed with PBS three times for 5 minutes each at 37°C and 5% CO<sub>2</sub> and were frozen at - 80°C until further analysis. DNA from hydrogels (n=6) was recovered mechanically using TissueLyser LT (Qiagen). Quantification of total DNA in the hydrogel constructs was performed with Quanti-iT<sup>™</sup> PicoGreen<sup>®</sup> dsDNA Assay Kit (Invitrogen) following the manufacturer's instructions using a fluorescent plate reader (Varioskan Flash from Thermo Scientific) at an excitation wavelength of 485 nm and an emission wavelength of 520 nm.

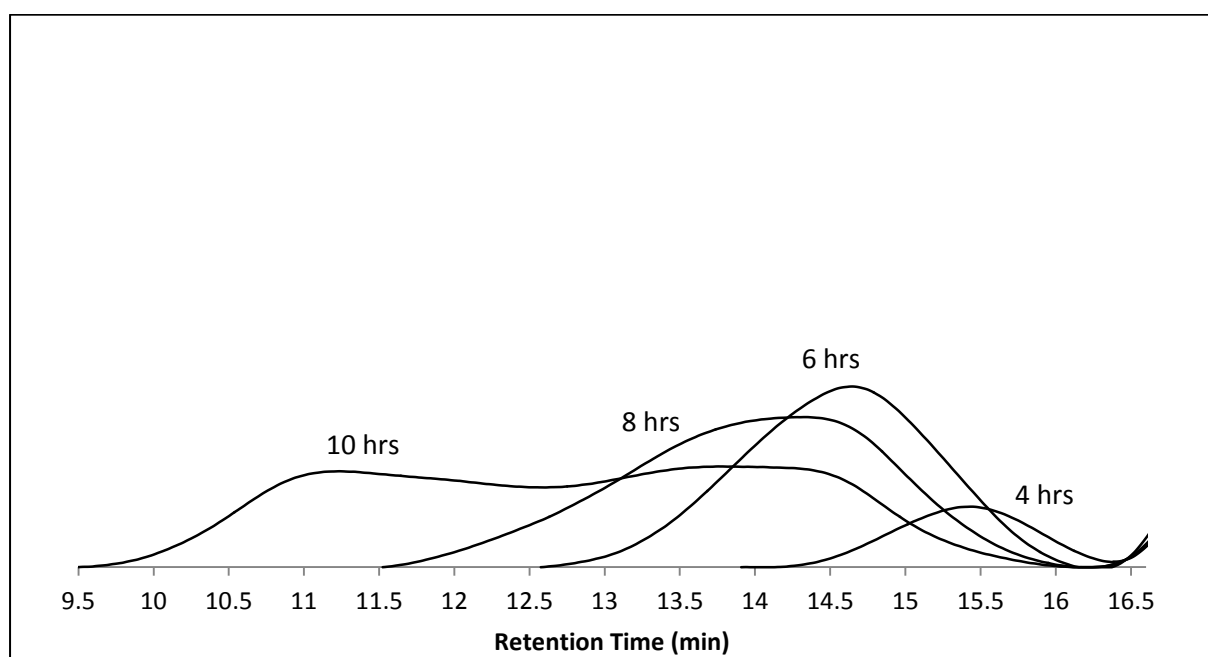

**Fig. S1:** GPC traces from RI detector for copolymerisation of Entry2, Table1; Final molecular weight of 376,000 g/mol and a polydispersity of 7.12 after 7.5hrs.

Supplementary Material (ESI) for Polymer Chemistry  
This journal is (c) The Royal Society of Chemistry 2013

**Table T1:** Copolymerisation of Polyethylene glycol diacrylate (PEGDA – 575 g/mol ) and polyethylene methyl ether methacrylate (PEGMEMMA – 500 g/mol ) via RAFT polymerisation (Entry 2, Table 1).

| Entry | I : RAFT Agent : M1: M2 <sup>a</sup> | SR (v/v) <sup>b</sup> | RT <sup>c</sup> | Monomer conversion (%) <sup>d</sup> | $M_w$ (kDa) <sup>e</sup> | PDI <sup>f</sup> |
|-------|--------------------------------------|-----------------------|-----------------|-------------------------------------|--------------------------|------------------|
| 1     | 0.8 : 1.6 : 75 : 50                  | 1:3                   | 4               | 10                                  | 9                        | 1.22             |
| 2     | 0.8 : 1.6 : 75 : 50                  | 1:3                   | 6               | 28                                  | 40                       | 1.55             |
| 3     | 0.8 : 1.6 : 75 : 50                  | 1:3                   | 8               | 40                                  | 59                       | 2.19             |
| 4     | 0.8 : 1.6 : 75 : 50                  | 1:3                   | 10              | 53                                  | 376                      | 7.12             |

<sup>a</sup>I - Initiator (ACHN): RAFT Agent - (2-cyanoprop-2-yl dithiobenzoate), M1:M2 - Monomer feed ratio (PEGDA (M1): PEGMEMMA (M2)), <sup>b</sup>SR - Monomer : Solvent (Butanone) (v/v), <sup>c</sup> Reaction time, <sup>d</sup> Monomer conversion estimated from copolymer and monomer peaks in GPC traces, <sup>e</sup>  $M_w$  - Weight Average molecular weight (1kDa = 1,000 g/mol), <sup>f</sup> Polydispersity index ( $M_w / M_n$ ).

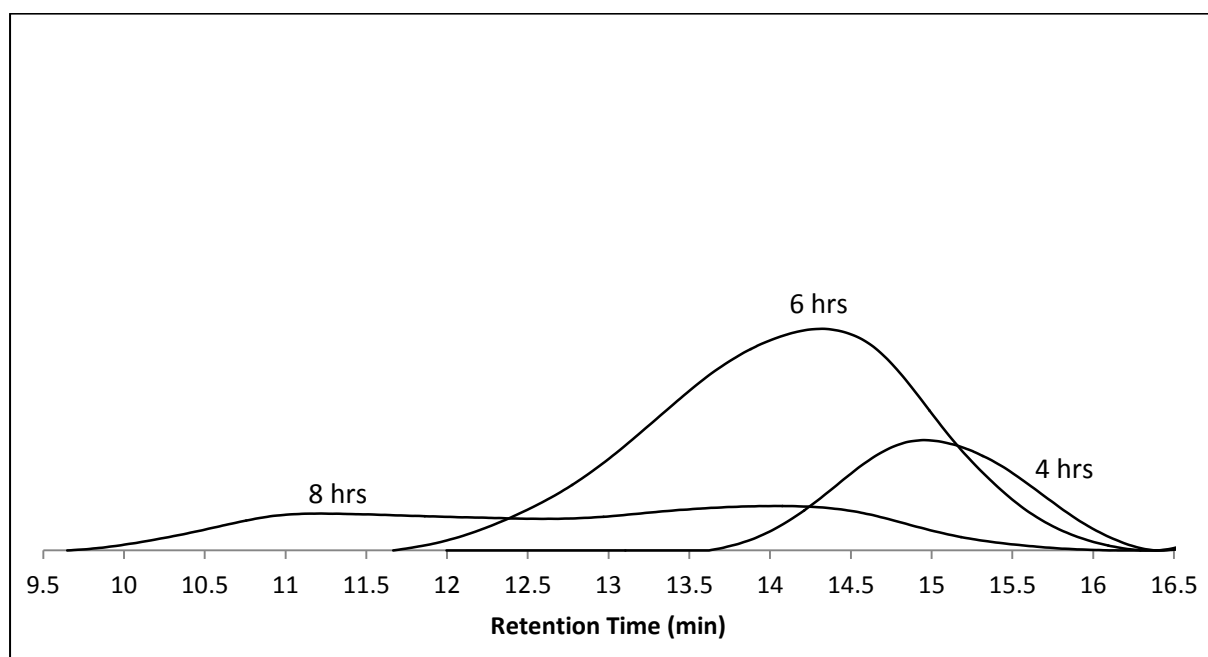

**Fig. S2:** GPC traces from RI detector for Entry 3, Table 2; Final molecular weight of 370,000 g/mol and a polydispersity of 7.21 after 8 hrs.

**Table T2:** Copolymerisation of Polyethylene glycol diacrylate (PEGDA – 575 g/mol ) and polyethylene methyl ether methacrylate (PEGMEMMA – 500 g/mol ) via RAFT polymerisation (Entry 3, Table 2).

| Entry | I : RAFT Agent : M1: M2 <sup>a</sup> | SR (v/v) <sup>b</sup> | RT <sup>c</sup> | Monomer conversion (%) <sup>d</sup> | $M_w$ (kDa) <sup>e</sup> | PDI <sup>f</sup> |
|-------|--------------------------------------|-----------------------|-----------------|-------------------------------------|--------------------------|------------------|
| 1     | 0.8 : 1.6 : 25 : 50                  | 1:3                   | 4               | 19                                  | 15                       | 1.34             |
| 2     | 0.8 : 1.6 : 25 : 50                  | 1:3                   | 6               | 24                                  | 50                       | 2.06             |
| 3     | 0.8 : 1.6 : 25 : 50                  | 1:3                   | 8               | 57                                  | 370                      | 7.21             |

<sup>a</sup>I - Initiator (ACHN): RAFT Agent - (2-cyanoprop-2-yl dithiobenzoate), M1:M2 - Monomer feed ratio (PEGDA (M1): PEGMEMMA (M2)), <sup>b</sup>SR - Monomer : Solvent (Butanone) (v/v), <sup>c</sup> Reaction time, <sup>d</sup> Monomer conversion estimated from copolymer and monomer peaks in GPC traces, <sup>e</sup>  $M_w$  - Weight Average molecular weight (1kDa = 1,000 g/mol), <sup>f</sup> Polydispersity index ( $M_w / M_n$ ).

Supplementary Material (ESI) for Polymer Chemistry  
This journal is (c) The Royal Society of Chemistry 2013

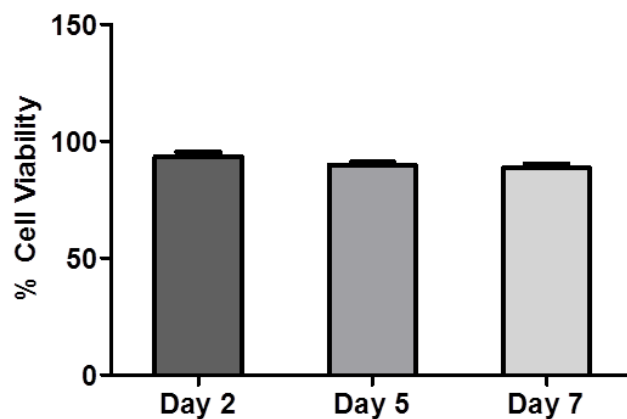

**Fig.S3:** The LIVE/DEAD<sup>®</sup> assay Cell Viability (Invitrogen) was used to visualize the distribution of living and dead cells in the hydrogel after 2, 5, and 7 days in 3D culture. Fluorescence images were taken using a Zeiss LSM 510 Axiovert Inverted Confocal Microscope.

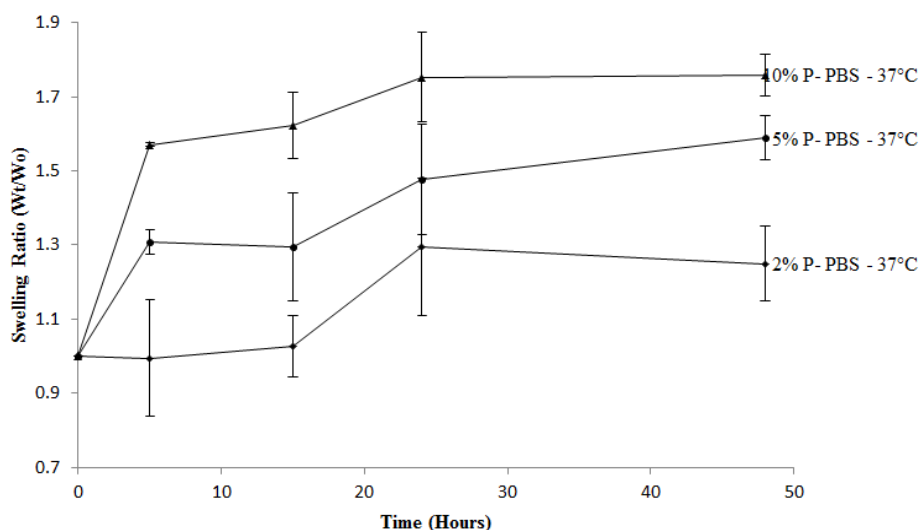

**Fig. S4:** Swelling studies carried out on polymer hyaluronan hydrogels in PBS (1M, pH 7.4) at 37°C during 48 hours. The higher polymer concentration in the hydrogels, the higher the swelling ratio resulted at 37 °C (i.e. 10%>5%>2%). (Mean ± SD,  $n=6$ ).

Supplementary Material (ESI) for Polymer Chemistry  
This journal is (c) The Royal Society of Chemistry 2013

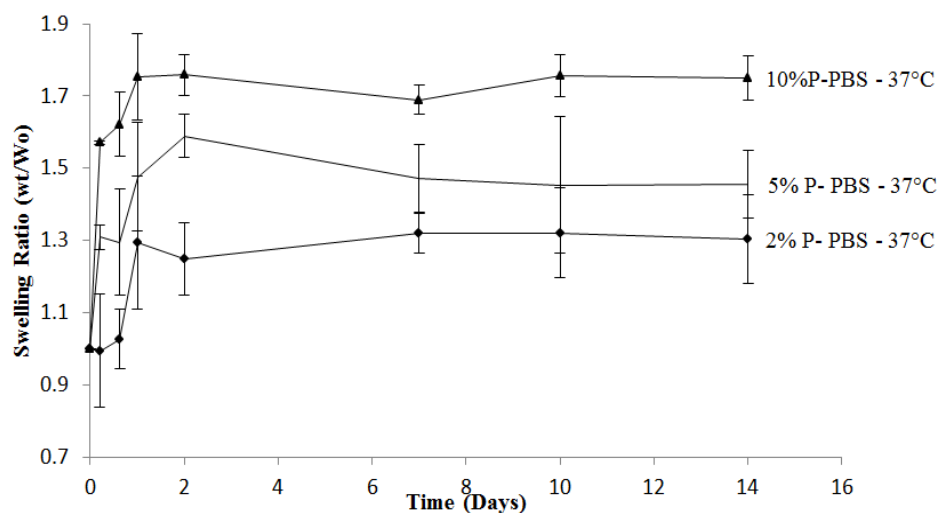

**Fig. S5:** Swelling studies carried out on polymer hyaluronan hydrogels in PBS (1M, pH 7.4) at 37°C during 14 days. (Mean  $\pm$  SD,  $n=6$ ).

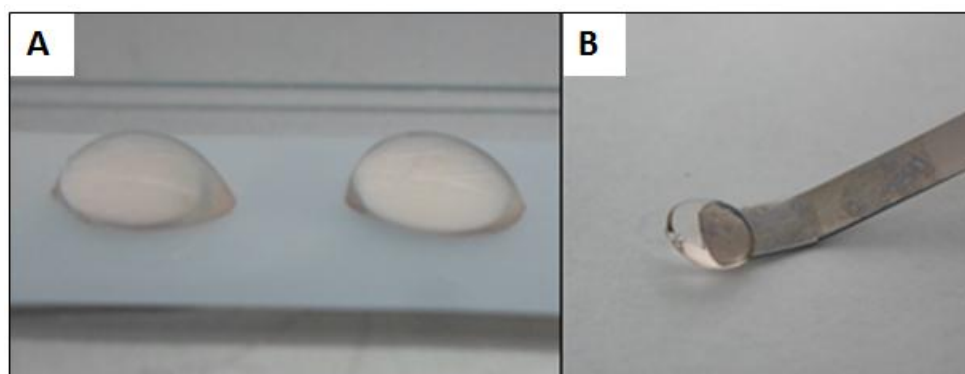

**Fig. S6:** (A) 40 $\mu$ l hydrogel formed *in situ* on Teflon Tape using (copolymer – Entry 1, table 2) (B) 40  $\mu$ l hydrogel illustrating good workability and ease of use (easily picked up without deformation).

Supplementary Material (ESI) for Polymer Chemistry  
This journal is (c) The Royal Society of Chemistry 2013

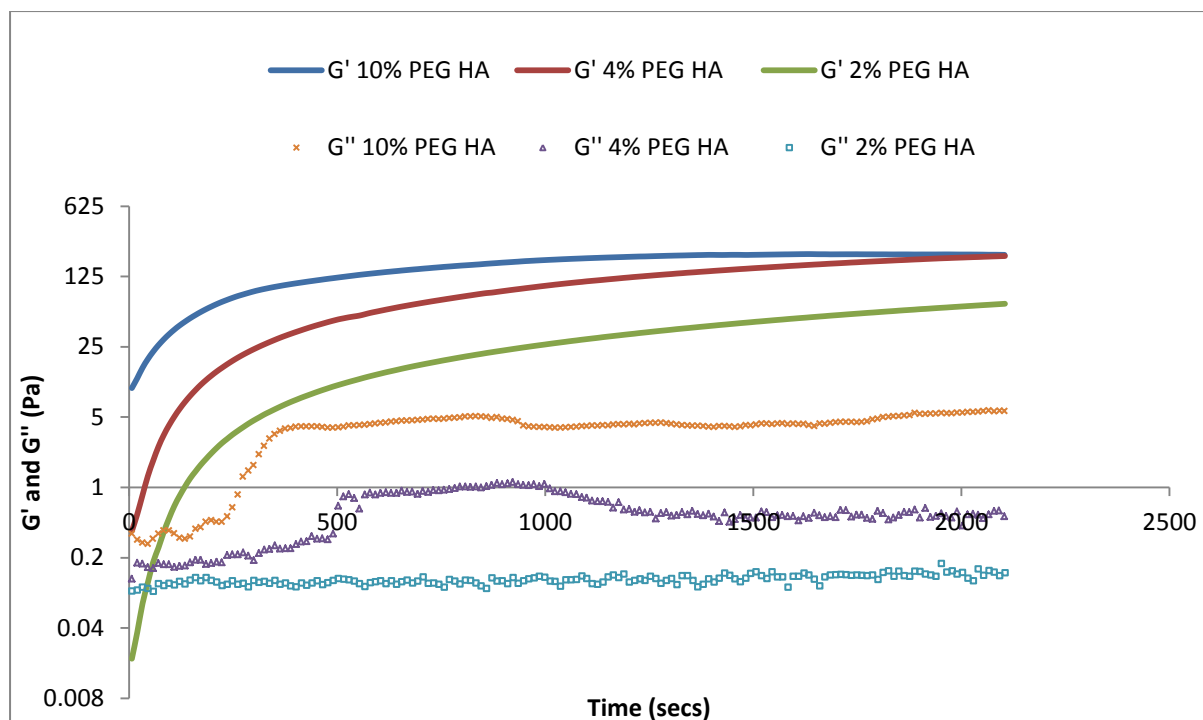

**Fig.S7:** A rheology study was performed obtaining the shear storage ( $G'$ ) and shear loss modulus ( $G''$ ) to demonstrate the quick gelation of the crosslinked networks using 10%, 4% and 2% final copolymer concentrations. The chemical crosslinking system cannot be precisely determined because the mixing of components (Copolymer (Entry 1, Table 2) and HA-SH) is required before loading the samples onto the plate of the rheometer and the reaction has already begun. (Ratio of Vinyl: Thiol - 1.3:1, 3:1, 12:1 for polymer samples at the concentration of 2%, 5% and 10% w/v respectively).
